# Supplementary material for: LARA: a Lagrangian Reanalysis based on ERA5 spanning from 1940 to 2023
Source: Copernicus journal article supplement (doi:10.5194/essd-17-4569-2025), 2025-09-18
Supplement: Supplementary file [file essd-17-4569-2025-supplement-title-page.pdf › essd-17-4569-2025-supplement-title-page.pdf]

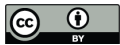

## *Supplement of*

# **LARA: a Lagrangian Reanalysis based on ERA5 spanning from 1940 to 2023**

**Lucie Bakels et al.**

*Correspondence to:* Lucie Bakels ([lucie.bakels@su.se](mailto:lucie.bakels@su.se))

- [essd-17-4569-2025-supplement-title-page.pdf](#)
- FLEXPART\_simulations
  - 194001-194703
    - \* options
  - 194701-195403
    - \* options
  - 195401-196103
    - \* options
  - 196101-196803
    - \* options
  - 196801-197503
    - \* options
  - 197501-198203
    - \* options
  - 198201-198903
    - \* options
  - 198901-199603
    - \* options
  - 199601-200303
    - \* options
  - 200301-201003
    - \* options
  - 201001-201703
    - \* options

- 201701-202403
  - \* options
- AVAILABLE
- FLEXPART\_ETA
- pathnames\_194001-194703
- pathnames\_194701-195403
- pathnames\_195401-196103
- pathnames\_196101-196803
- pathnames\_196801-197503
- pathnames\_197501-198203
- pathnames\_198201-198903
- pathnames\_198901-199603
- pathnames\_199601-200303
- pathnames\_200301-201003
- pathnames\_201001-201703
- pathnames\_201701-202403
- submit1940
- submit1947
- submit1954
- submit1961
- submit1968
- submit1975
- submit1982
- submit1989
- submit1996
- submit2003
- submit2010
- submit2017

- Figure\_01

- ComputeDensity\_zarr.py
- PlotDensity.py
- start.py

- Figure\_02

- AMOindex.dat
- Energy.py
- PDOindex.dat
- PlotEnergy.py
- SelectParticles\_zarr.py

- Figure\_03

- PlotWCB.py

- SelectWCB\_zarr.py
  - WCB.py
- Figure\_04
  - plot\_travel\_time.py
  - travel\_time\_zarr.py
- Figure\_05
  - ATCE.py
  - PlotAssimilation.py
  - assimilation\_zarr.py

The copyright of individual parts of the supplement might differ from the article licence.
